# Supplementary material for: Health-related quality of life in advanced colorectal cancer patients in China: a nationwide hospital-based survey
Source: PubMed Central journal article supplement — Ann Transl Med. 2022 Mar;10(6):328. doi: 10.21037/atm-22-991 (PMC9011208; doi:10.21037/atm-22-991), 2022-03
Supplement: atm-10-06-328-rc.pdf [file atm-10-06-328-rc.pdf]

## Quality assessment criteria for survey research reports

| Category                  | Item                                                                                                                                                                                                                       | Reported on Page Number/Line Number | Reported on Section/Paragraph |
|---------------------------|----------------------------------------------------------------------------------------------------------------------------------------------------------------------------------------------------------------------------|-------------------------------------|-------------------------------|
| <b>Title and abstract</b> |                                                                                                                                                                                                                            |                                     |                               |
|                           | Is the design of the study stated in the title and/or abstract?                                                                                                                                                            | Page3/Line75-76                     | Abstract/Paragraph2           |
| <b>Introduction</b>       |                                                                                                                                                                                                                            |                                     |                               |
|                           | a) Is there an explanation of why the research is necessary, placing the study in context of previous work in relevant fields?                                                                                             | Page4/Line 109-131                  | Introduction/Paragraph1       |
|                           | b) Is the purpose or aim of the paper explained?                                                                                                                                                                           | Page4-5/Line131-134                 | Introduction/Paragraph2       |
| <b>Methods</b>            |                                                                                                                                                                                                                            |                                     |                               |
| Research tool             | a) Is the questionnaire described?                                                                                                                                                                                         | Page6/Line 167-184                  | Instrument/Paragraph1         |
|                           | b) If an existing tool was used, are its psychometric properties presented?                                                                                                                                                | Page6/Line168-175                   | Instrument/Paragraph1         |
|                           | c) If an existing tool was used, are references to the original work provided?                                                                                                                                             | Page6/Line168-169                   | Instrument/Paragraph1         |
|                           | d) If a new tool was used, are the procedures used to develop and pre-test provided?                                                                                                                                       | Page6/Line174-181                   | Instrument/Paragraph1         |
|                           | e) If a new tool was used, have its reliability and validity been reported?                                                                                                                                                | Page6/Line175-178                   | Instrument/Paragraph1         |
|                           | f) Is a description of the scoring procedures provided?                                                                                                                                                                    | Page6/Line186-202                   | Procedure/Paragraph1          |
| Sample selection          | a) Is there a description of the survey population and the sample frame used to identify this population?                                                                                                                  | Page5/Line149-161                   | Population/Paragraph1         |
|                           | b) Do the authors provide a description of how representative the sample is of the underlying population?                                                                                                                  | Page5/Line138-146                   | Setting/Paragraph1            |
|                           | c) Is a sample size calculation or rationale/justification for the sample size presented?                                                                                                                                  | Page5/Line163-166                   | Sample size/Paragraph1        |
| Survey administration     | a) Mode of administration?                                                                                                                                                                                                 | Page6/Line186-188                   | Procedure/Paragraph1          |
|                           | b) Do the authors provide information on the type of contact and how many attempts were made to contact subjects (i.e., prenotification by letter or telephone, reminder postcard, duplicate questionnaire with reminder)? | Page6/Line189-191                   | Procedure/Paragraph1          |
|                           | c) Do the authors report whether incentives were provided (financial or other)?                                                                                                                                            | Page6/Line189-190                   | Procedure/Paragraph1          |
|                           | d) Is there a description of who approached potential participants (e.g., identification of who signed the covering letter)?                                                                                               | Page6/Line192-197                   | Procedure/Paragraph1          |

|                                   |                                                                                                            |                      |                                            |
|-----------------------------------|------------------------------------------------------------------------------------------------------------|----------------------|--------------------------------------------|
| Analysis                          | a) Is the method of data analysis described?                                                               | Page7/Line205–221    | Statistical analysis/Paragraph1            |
|                                   | b) Do the authors provide methods for analysis of nonresponse error?                                       | NA                   | NA                                         |
|                                   | c) Is the method for calculating response rate provided?                                                   | NA                   | NA                                         |
|                                   | d) Are definitions provided for complete versus partial completions?                                       | NA                   | NA                                         |
|                                   | e) Are the methods for handling item missing data provided?                                                | Page7/Line209–219    | Statistical analysis/Paragraph1            |
| <b>Results</b>                    |                                                                                                            |                      |                                            |
|                                   | a) Is the response rate reported?                                                                          | NA                   | NA                                         |
|                                   | b) Are all respondents accounted for?                                                                      | Page7/Line224–230    | Result/Paragraph1                          |
|                                   | c) Is information given on how nonrespondents differ from respondents?                                     | NA                   | NA                                         |
|                                   | d) Are the results clearly presented?                                                                      | Page7–9/Line231–280  | Result/Paragraph2–4                        |
|                                   | e) Do the results address the objective(s)?                                                                | Page7–9/Line224–280  | Result/Paragraph1–4                        |
| <b>Discussion</b>                 |                                                                                                            |                      |                                            |
|                                   | a) Are the results summarized with reference to the study objectives?                                      | Page9–13/Line282–405 | Discussion/paragraph1–10                   |
|                                   | b) Are the strengths of the study stated?                                                                  | Page13/Line407–412   | Study strengths and limitations/Paragraph1 |
|                                   | c) Are the limitations of the study (taking into account potential sources of bias or imprecision) stated? | Page13/Line413–415   | Study strengths and limitations/Paragraph2 |
|                                   | d) Is there explicit discussion of the generalizability (external validity) of the results?                | Page13/Line417–424   | Conclusion/Paragraph1                      |
| <b>Ethical quality indicators</b> |                                                                                                            |                      |                                            |
|                                   | a) Study funding reported?                                                                                 | Page14/Line433–434   | Acknowledge/Paragraph1                     |
|                                   | b) Research Ethics Board (REB) review reported?                                                            | Page14/Line441–444   | Footnote/Paragraph 3                       |
|                                   | c) Reporting of subject consent procedures?                                                                | Page7/Line190–192    | Produce/Paragraph1                         |

Article information: <https://dx.doi.org/10.21037/atm-22-991>

\*As the checklist was provided upon initial submission, the page number/line number reported may be changed due to copyediting and may not be referable in the published version. In this case, the section/paragraph may be used as an alternative reference.
